# Supplementary material for: Genetic Analysis and Clinical Characteristics of Hereditary Pheochromocytoma and Paraganglioma Syndrome in Korean Population
Source: PubMed Central journal article supplement — Endocrinol Metab (Seoul). 2020 Dec 31;35(4):858–72. doi: 10.3803/EnM.2020.683 (PMC7803615; doi:10.3803/enm.2020.683), 2020-12-31
Supplement: enm-2020-683-suppl1.pdf [file enm-2020-683-suppl1.pdf]

**Supplemental Table S1.** List of Genes Included in the Severance Hospital's Novel Next-Generation Sequencing Panel

|           |         |         |         |          |         |          |         |          |          |
|-----------|---------|---------|---------|----------|---------|----------|---------|----------|----------|
| ABCA1     | ABCC8   | ABCG1   | ABCG5   | ABCG8    | ADRB2   | ADRB3    | AGL     | AGPAT2   | AGRP     |
| AIP       | AIRE    | AKAP2   | AKR1C2  | AKR1C4   | AKT2    | ALMS1    | AMH     | AMHR2    | ANGPTL3  |
| ANOS1     | AP2S1   | APC     | APOA1   | APOA4    | APOA5   | APOB     | APOC2   | APOC3    | APOE     |
| APPL1     | AQP2    | AR      | ARAP1   | ARL4D    | ARL6    | ARMC5    | ARX     | ATP1A1   | ATP2B3   |
| ATP7A     | ATRX    | AVP     | AVPR2   | BBS1     | BBS10   | BBS12    | BBS2    | BBS4     | BBS5     |
| BBS7      | BBS9    | BDNF    | BLK     | BMP15    | BRAF    | BSCL2    | BTK     | CA2      | CACNA1D  |
| CARTPT    | CASR    | CAV1    | CAV2    | CBX2     | CCND1   | CDC73    | CDKL5   | CDKN1A   | CDKN1B   |
| CDKN1C    | CDKN2B  | CDKN2C  | CEL     | CEP290   | CEP41   | CETP     | CHD7    | CIDEC    | CISD2    |
| CLCN7     | COL1A1  | COL1A2  | COL3A1  | COL5A1   | COL5A2  | COL9A1   | COL9A2  | COL9A3   | COLEC11  |
| COMP      | CP      | CREB3L3 | CREBBP  | CRTAP    | CRTC1   | CRY2     | CUL3    | CUL4B    | CY5A     |
| CYP11A1   | CYP11B1 | CYP11B2 | CYP17A1 | CYP19A1  | CYP21A2 | DHCR24   | DHCR7   | DHH      | DMRT1    |
| DMRT2     | DNAJC3  | DUSP6   | DYRK1B  | EGLN1    | EIF2AK3 | ELN      | EMX2    | ENPP1    | EPAS1    |
| FBP1      | FERMT3  | FEZF1   | FGD1    | FGF17    | FGF8    | FGF9     | FGFR1   | FGFR2    | FH       |
| FIGLA     | FKBP10  | FLRT3   | FOXC2   | FOXE1    | FOXL2   | FOXP3    | FRAS1   | FREM2    | FSHB     |
| FSHR      | G6PC    | GALNT2  | GATA3   | GATA4    | GATA6   | GBE1     | GCK     | GCKR     | GCM2     |
| GDF9      | GHR     | GHRL    | GLI2    | GLI3     | GLIS3   | GLUD1    | GNA11   | GNAS     | GNRH1    |
| GNRHR     | GPD1    | GPIHBP1 | GPR161  | GRIP1    | GYS2    | HADH     | HADHA   | HADHB    | HESX1    |
| HFE       | HHIP    | HIRA    | HNF1A   | HNF1B    | HNF4A   | HOXA13   | HRAS    | HS6ST1   | HSD17B3  |
| HSD3B1    | HSD3B2  | ICK     | IER3IP1 | IFIH1    | IFITM5  | IGFALS   | IKBKG   | IL17RD   | INS      |
| INSL3     | INSR    | IRF6    | IYD     | KAT6B    | KCNJ11  | KCNJ5    | KIF1B   | KISS1    | KISS1R   |
| KLF11     | KLHL3   | KRAS    | LCAT    | LDLR     | LDLRAP1 | LEP      | LEPR    | LHB      | LHCGR    |
| LHX3      | LHX4    | LIMK1   | LIPA    | LIPC     | LIPE    | LIPG     | LMF1    | LMNA     | LMNB2    |
| LPIN1     | LPL     | LRP5    | LRP6    | MADD     | MAGEL2  | MAMLD1   | MAP2K1  | MAP2K2   | MAP3K1   |
| MATN3     | MAX     | MC2R    | MC3R    | MC4R     | MCM4    | MEF2A    | MEN1    | MKKS     | MKS1     |
| MLXIPL    | MTTP    | MYLIP   | NEUROD1 | NEUROG3  | NF1     | NIPBL    | NKX2-1  | NKX2-5   | NLGN4X   |
| NNT       | NOBOX   | NOTCH2  | NPC1L1  | NR0B1    | NR0B2   | NR5A1    | NRAS    | NSMF     | NTRK1    |
| NTRK2     | OCRL    | OPHN1   | OSTM1   | OTC      | OTX1    | OTX2     | P3H1    | PAX4     | PAX8     |
| PAX9      | PCK1    | PCK2    | PCSK1   | PCSK9    | PDX1    | PHF6     | PHIP    | PHKA2    | PHKB     |
| PHKG2     | PITX2   | PLEKHM1 | PLIN1   | PLOD1    | PLOD2   | PLTP     | PNPLA2  | POLD1    | POMC     |
| POR       | POU1F1  | PPARA   | PPARG   | PPARGC1B | PPIB    | PRKAR1A  | PROK2   | PROKR2   | PROP1    |
| PSMC3IP   | PTEN    | PTF1A   | PTH     | PTH1R    | PTPN11  | PTRF     | PYGL    | PYY      | RASGRP2  |
| RB1       | RET     | RFX6    | ROR2    | RSPO1    | RXFP2   | SALL1    | SAR1B   | SCARB1   | SDC3     |
| SDCCAG8   | SDHA    | SDHAF2  | SDHB    | SDHC     | SDHD    | SECISBP2 | SEMA3A  | SEMA3E   | SERPINF1 |
| SERPINH1  | SIM1    | SLC16A1 | SLC16A2 | SLC26A2  | SLC26A4 | SLC2A2   | SLC37A4 | SLC39A13 | SLC5A5   |
| SLC9A3R1  | SORT1   | SOX10   | SOX2    | SOX3     | SOX9    | SP7      | SPECC1L | SPRY4    | SRA1     |
| SRD5A2    | SREBF1  | SRY     | STAP1   | STAR     | STK11   | STS      | STX16   | SULT2A1  | TAC3     |
| TACR3     | TBC1D4  | TBCE    | TCIRG1  | TCTN3    | TG      | THRA     | THRB    | TMEM127  | TMEM38B  |
| TNFRSF11A | TNFSF11 | TP53    | TPO     | TRHR     | TRIB1   | TRIM32   | TSHB    | TSHR     | TSPYL1   |
| TTC8      | UBR1    | UCP1    | UCP2    | UCP3     | VHL     | VPS13B   | WDPCP   | WDR11    | WFS1     |
| WNK1      | WNK4    | WNT1    | WNT4    | WNT7A    | WRN     | WT1      | WWOX    | ZFP57    | ZFPM2    |
