# Supplementary material for: Genetic Analysis and Clinical Characteristics of Hereditary Pheochromocytoma and Paraganglioma Syndrome in Korean Population
Source: PubMed Central journal article supplement — Endocrinol Metab (Seoul). 2020 Dec 31;35(4):858–72. doi: 10.3803/EnM.2020.683 (PMC7803615; doi:10.3803/enm.2020.683), 2020-12-31
Supplement: enm-2020-683-suppl2.pdf [file enm-2020-683-suppl2.pdf]

**Supplemental Table S2.** Germline Mutations and Clinical Phenotypes of Patients with Variants of Unknown Significant Mutations of PPGL-Related Genes

| Case no. | Sex/ Type of age | Gene | Exon    | Mutation | Period                   | Genetic analysis | ACMG category | Location          | Tumor size, cm | Metastasis | Recurrence | Presence of other tumor                     | Discovery route | Biochemical profile |
|----------|------------------|------|---------|----------|--------------------------|------------------|---------------|-------------------|----------------|------------|------------|---------------------------------------------|-----------------|---------------------|
| 1        | M/59             | PCC  | SDHB    | 5        | c.541-3C>T               | Post-NGS         | Targeted NGS  | Lt adrenal        | 1.8            | Benign     | No         | GIST of esophagus, tubular adenoma of colon | Incidental      | Noradrenergic       |
| 2        | M/64             | PCC  | SDHC    | 2-6      | Exon2-6 duplication      | Post-NGS         | Targeted NGS  | Rt adrenal        |                | Benign     | No         |                                             | Incidental      | Noradrenergic       |
| 3        | F/44             | PCC  | EPAS1   | 9        | c.1250G>A (p.Gly417Glu)  | Post-NGS         | Targeted NGS  | Rt adrenal        | 4.0            | Benign     | No         |                                             | Incidental      | Noradrenergic       |
| 4        | F/56             | PCC  | TMEM127 | 2        | c.394G>A (p.Ala132Thr)   | Post-NGS         | Targeted NGS  | Bilateral adrenal |                | Benign     | No         | PTC, prolactinoma                           | Incidental      | Noradrenergic       |
| 5        | M/20             | PGL  | SDHB    | 6        | c.642G>C (p.Gln214His)   | Post-NGS         | Targeted NGS  | Bladder           | 3.6            | Benign     | No         |                                             | Symptomatic     | Noradrenergic       |
| 6        | F/47             | PGL  | EPAS1   | 12       | c.1565A>G (p.Asn522Ser)  | Post-NGS         | Targeted NGS  | Retroperitoneum   | 2.7            | Benign     | No         | Thyroid cancer                              | Symptomatic     | Noradrenergic       |
| 7        | F/58             | PGL  | KIF1B   | 30       | c.3404G>A (p.Arg1135Gln) | Post-NGS         | Targeted NGS  | Retroperitoneum   | 4.8            | Benign     | No         | PTC, DCIS of breast                         | Incidental      | Noradrenergic       |

PPGL, pheochromocytoma and paraganglioma; ACMG, American College of Medical Genetics and Genomics; PCC, pheochromocytoma; SDH, succinate dehydrogenase; NGS, next-generation sequencing; VUS, variant of unknown significance; Lt, left; GIST, gastrointestinal stromal tumor; Rt, right; PTC, papillary thyroid carcinoma; PGL, paraganglioma; DCIS, ductal carcinoma *in situ*.
